# Supplementary material
Source: PubMed Central journal article supplement (PMC2040902)
Supplement: pnas_0704695104_1.pdf [file pnas_0704695104_1.pdf]

**Table 4. Yeast strains used in this study**

| Strain no. | Relevant genotype                 | Reference  |
|------------|-----------------------------------|------------|
| SJR922     | WT                                | (1)        |
| SJR989     | <i>msh2</i>                       | (1)        |
| SJR994     | <i>msh6</i>                       | (1)        |
| SJR1168    | <i>msh3</i>                       | (1)        |
| SJR1384    | <i>rad52</i>                      | This study |
| SJR1454    | <i>rad16</i>                      | This study |
| GCY2009    | <i>rad51</i>                      | This study |
| GCY2016    | <i>rad59</i>                      | This study |
| GCY2025    | <i>mlh1</i>                       | This study |
| GCY2053    | <i>sgs1</i>                       | This study |
| SJR1141    | Inverted <i>lys2; rad16</i>       | This study |
| GCY2119    | Inverted <i>lys2; rad16, msh2</i> | This study |
| GCY2120    | Inverted <i>lys2; rad16, msh6</i> | This study |
| GCY2147    | Inverted <i>lys2; rad16, msh3</i> | This study |
| GCY2117    | Inverted <i>lys2; rad16, mlh1</i> | This study |

1. Harfe BD, Jinks-Robertson S (1999) Mol Cell Biol 19:4766-4773.
